# Supplementary material
Source: PubMed Central journal article supplement (PMC1140464)

### air

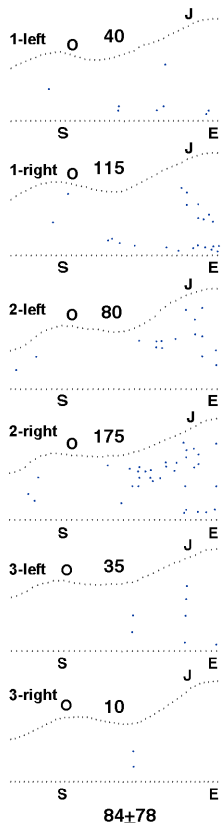

### DMSO

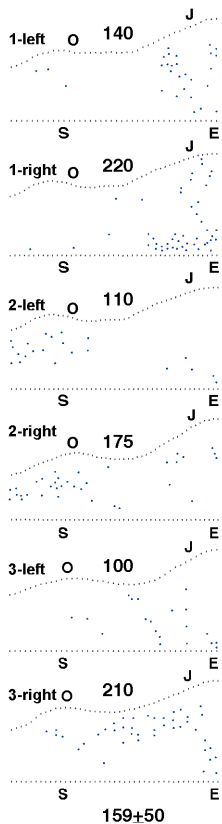

### water

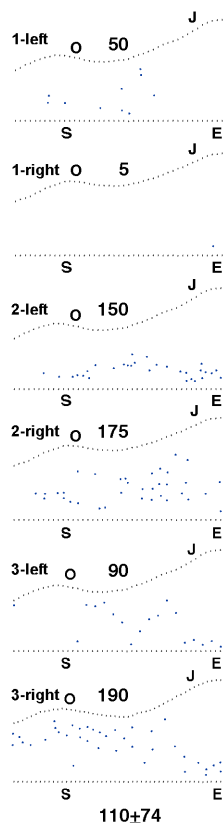

Supplement: pnas_0503027102_1.pdf [file pnas_0503027102_1.pdf]
